# Supplementary material for: Explaining trends and changing seasonal cycles of surface ozone in North America and Europe over the 2000–2018 period: A global modelling study with NO x and VOC tagging
Source: Copernicus journal article supplement (doi:10.5194/egusphere-2024-3752), 2024-12-13
Supplement: Supplementary file 1 [file egusphere-2024-3752-supplement.pdf]

**SUPPLEMENTARY MATERIAL FOR:  
Explaining trends and changing seasonal cycles of surface ozone in  
North America and Europe over the 2000-2018 period: A global  
modelling study with NO<sub>x</sub> and VOC tagging**

5

Tabish Ansari<sup>1</sup>, Aditya Nalam<sup>1,2</sup>, Aurelia Lupaşcu<sup>3</sup>, Carsten Hinz<sup>4</sup>, Simon Grasse<sup>4</sup>, and Tim Butler<sup>1,2</sup>

<sup>1</sup>Research Institute for Sustainability - Helmholtz Centre Potsdam (RIFS), Potsdam, 14467, Germany

<sup>2</sup>Institut für Meteorologie, Freie Universität Berlin, Berlin, Germany

10 <sup>3</sup>European Center for Medium Range Weather Forecasts (ECMWF), Bonn, 53175, Germany

<sup>4</sup>Jülich Supercomputing Centre (JSC), Forschungszentrum Jülich GmbH, 52428 Jülich, Germany

*Correspondence to:* Tabish Ansari (tabish.ansari@rifs-potsdam.de)

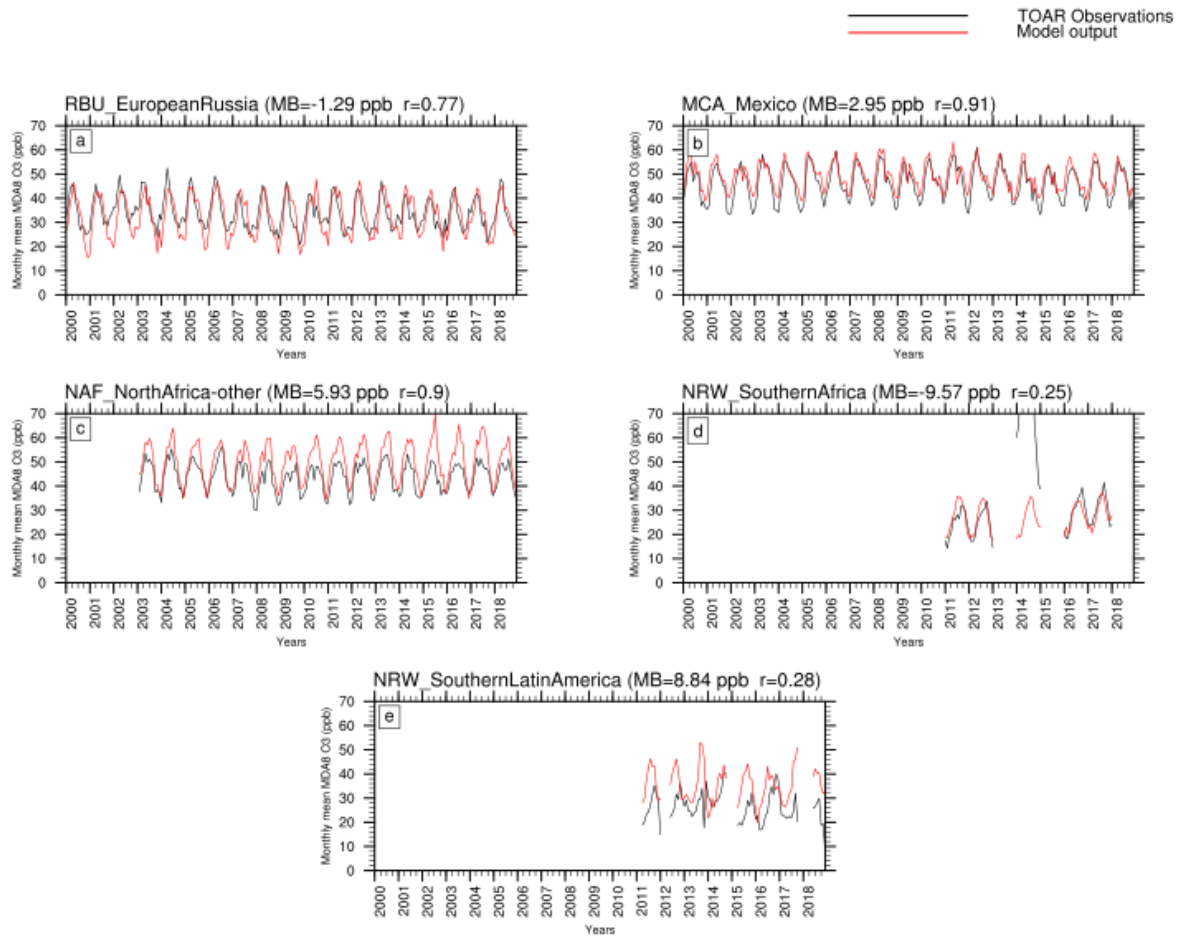

15

**Figure S1: Time series of observed versus simulated monthly mean MDA8 O<sub>3</sub> for various receptor regions. Only rural stations data were utilized from the TOAR database and model output was fetched only for those gridcells where observations were available.**

20

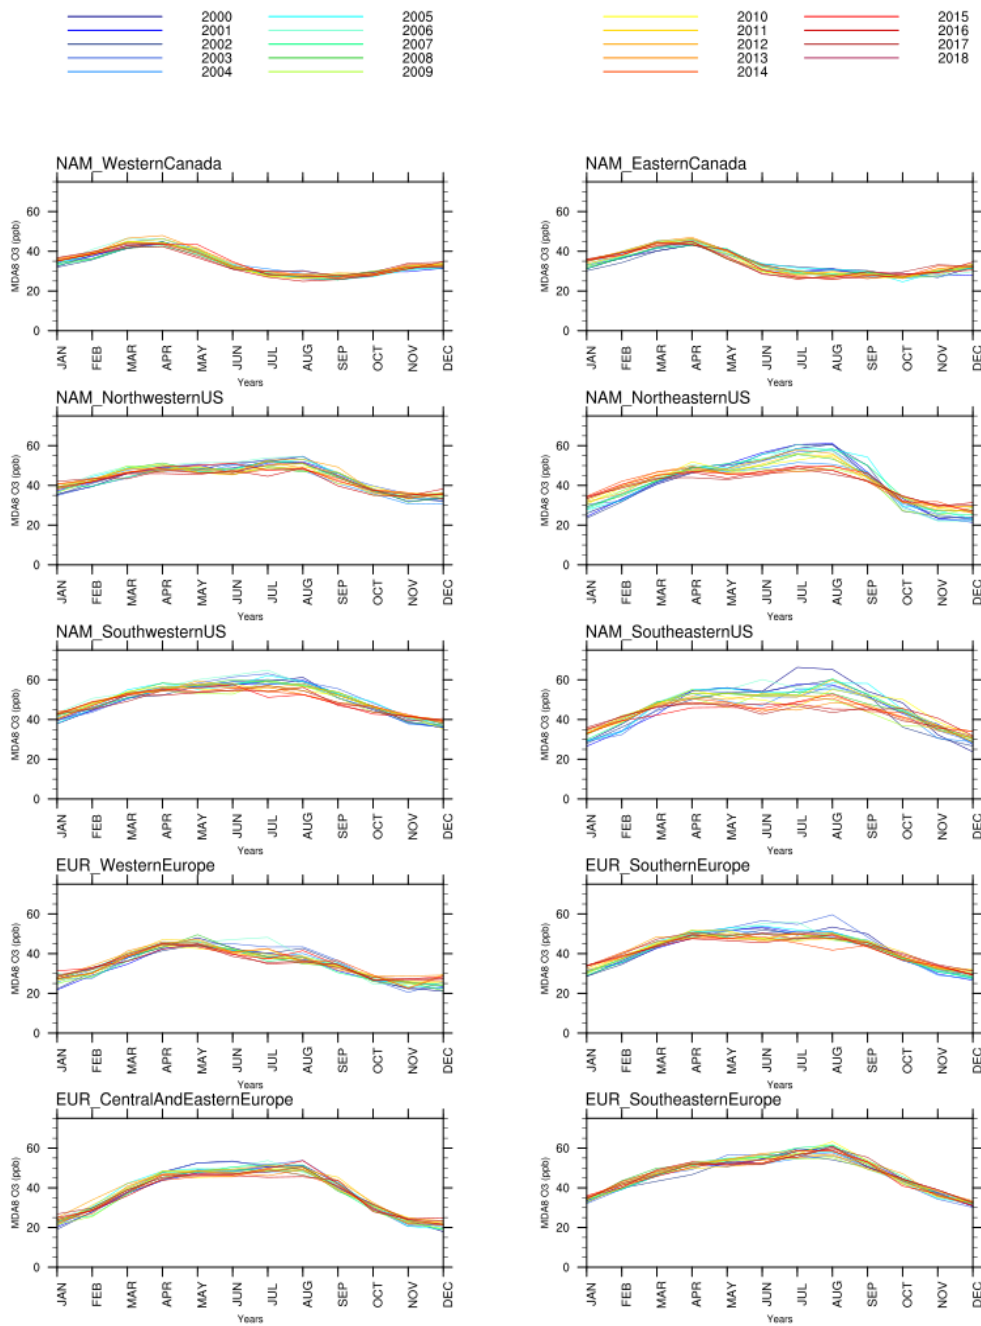

25 **Figure S2: Envelope plots for regional averaged MDA8 O<sub>3</sub> seasonal cycles for 2000-2018 for different receptor regions in North America and Europe. Model output was sampled from all gridcells within the geographic definition of each receptor region.**

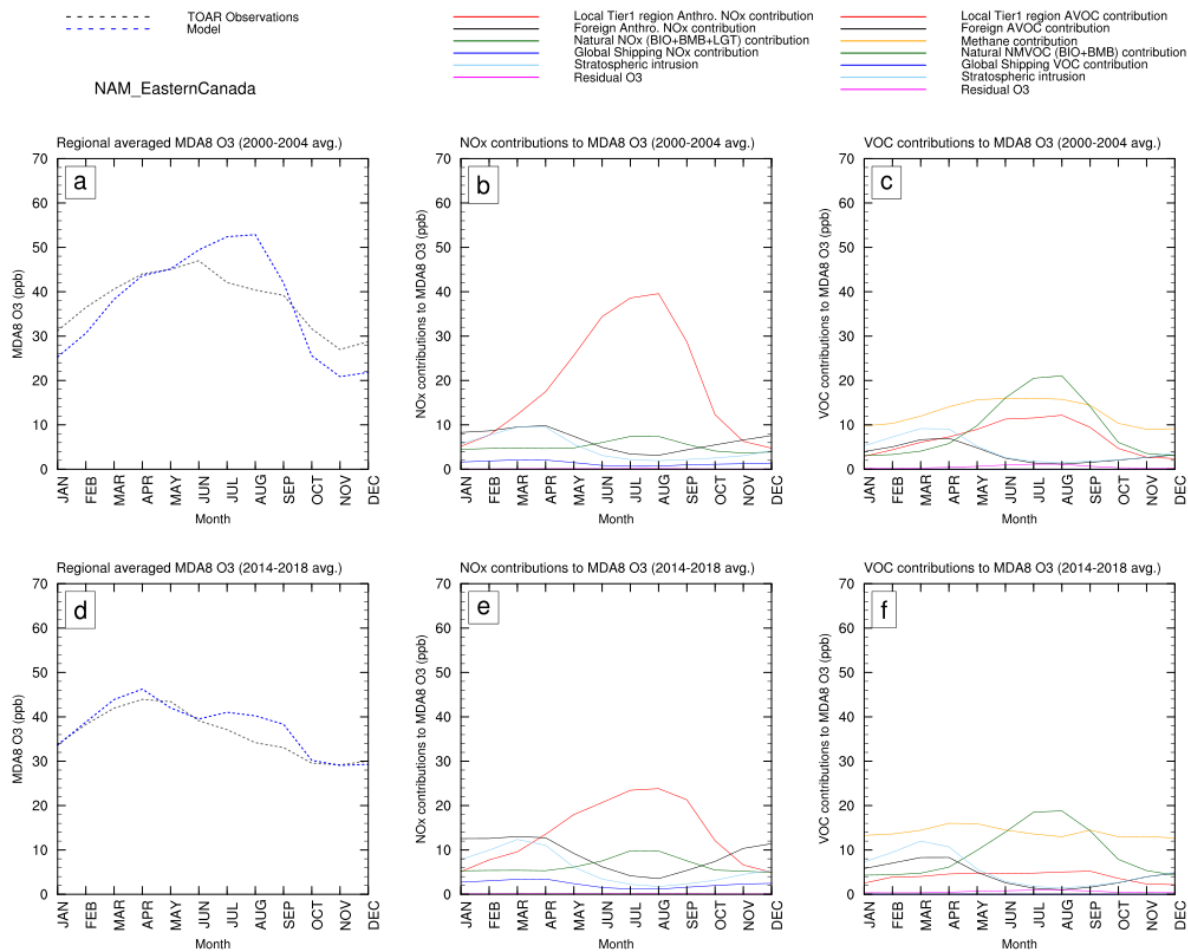

**Figure S3: 5-year average MDA8 O<sub>3</sub> seasonal cycles for Eastern Canada for 2000-2004 (a) and 2014-2018 (b) along with their NO<sub>x</sub> (b,e) and VOC contributions (c,f).**

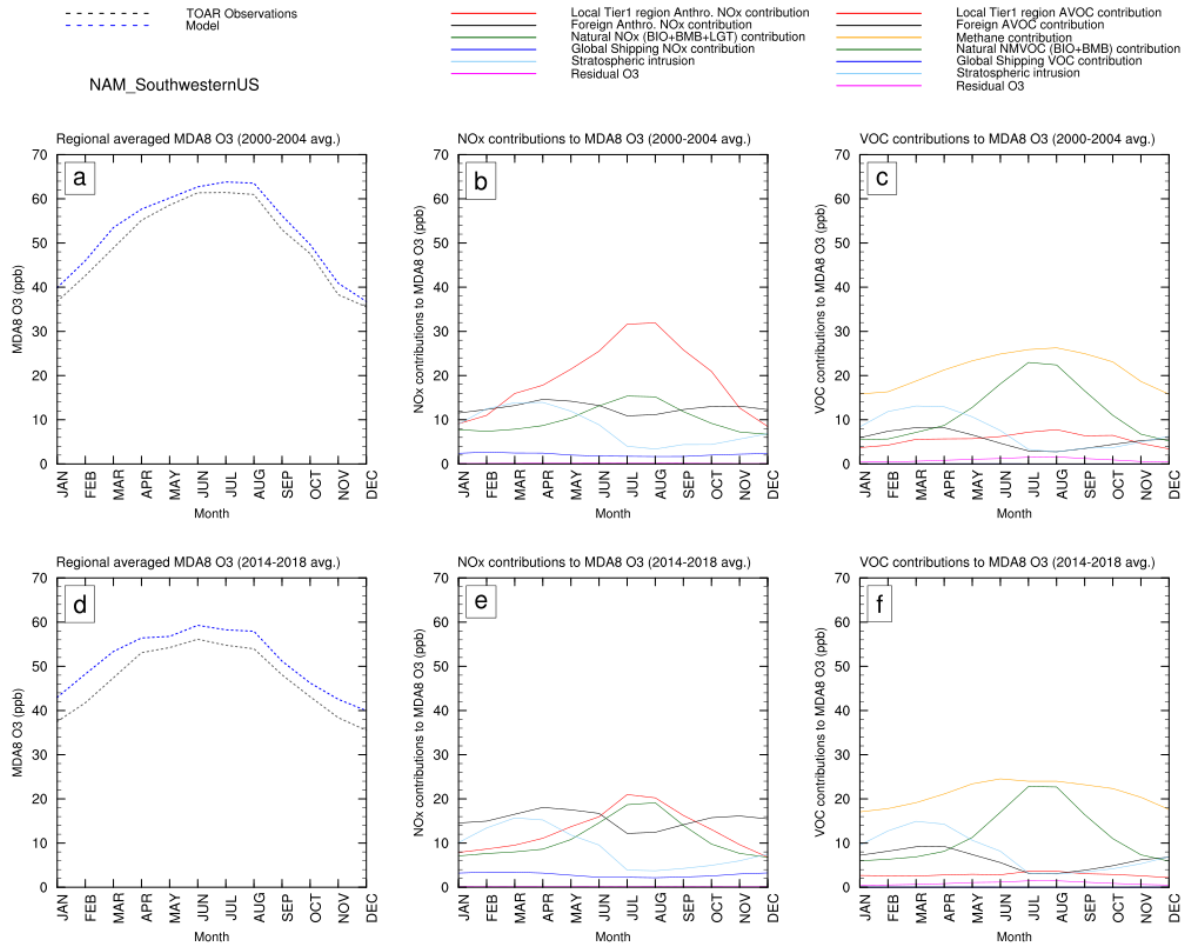

**Figure S4: 5-year average MDA8 O<sub>3</sub> seasonal cycles for Southwestern US for 2000-2004 (a) and 2014-2018 (b) along with their NO<sub>x</sub> (b,e) and VOC contributions (c,f).**

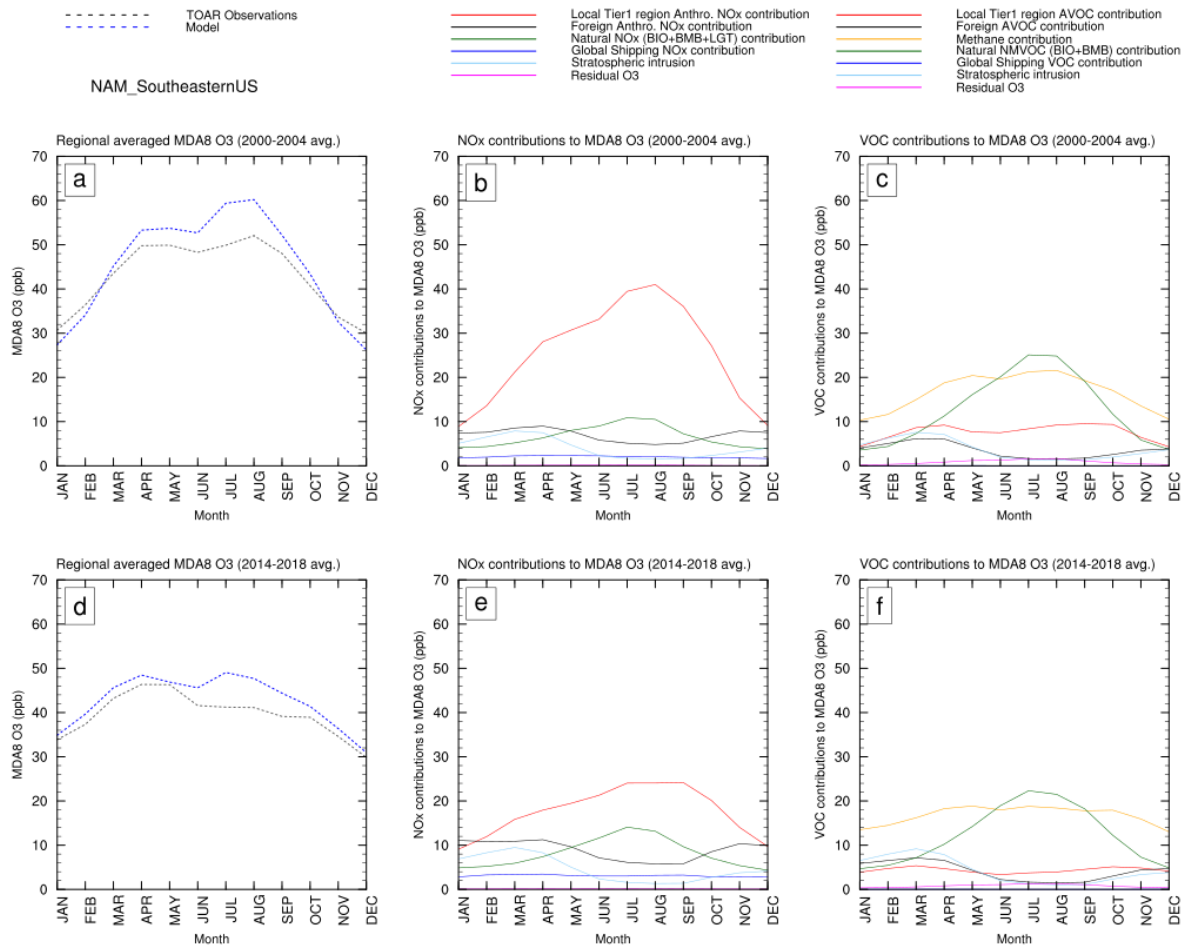

35

**Figure S5: 5-year average MDA8 O<sub>3</sub> seasonal cycles for Southeastern US for 2000-2004 (a) and 2014-2018 (b) along with their NO<sub>x</sub> (b,e) and VOC contributions (c,f).**

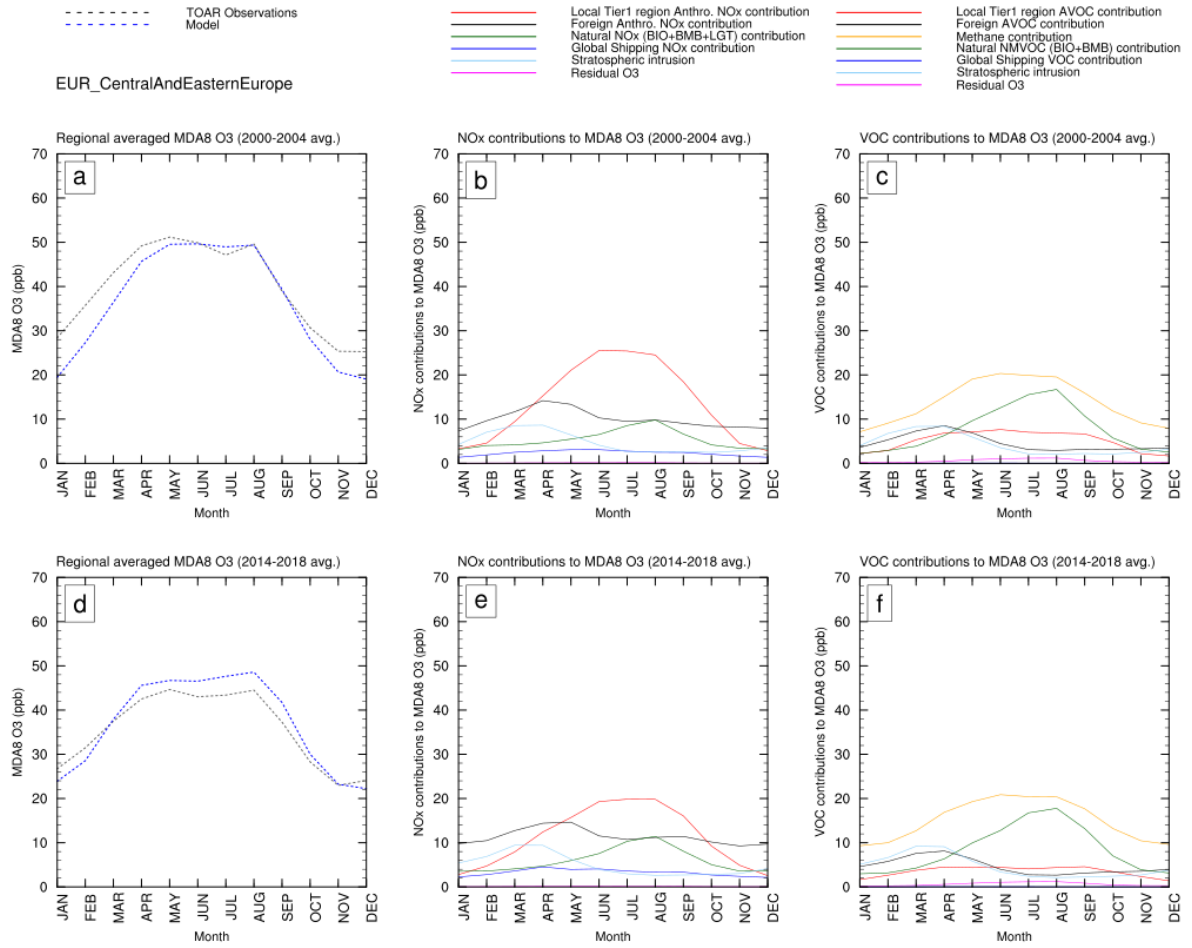

40

**Figure S6: 5-year average MDA8 O<sub>3</sub> seasonal cycles for Central & Eastern Europe for 2000-2004 (a) and 2014-2018 (b) along with their NO<sub>x</sub> (b,e) and VOC contributions (c,f).**

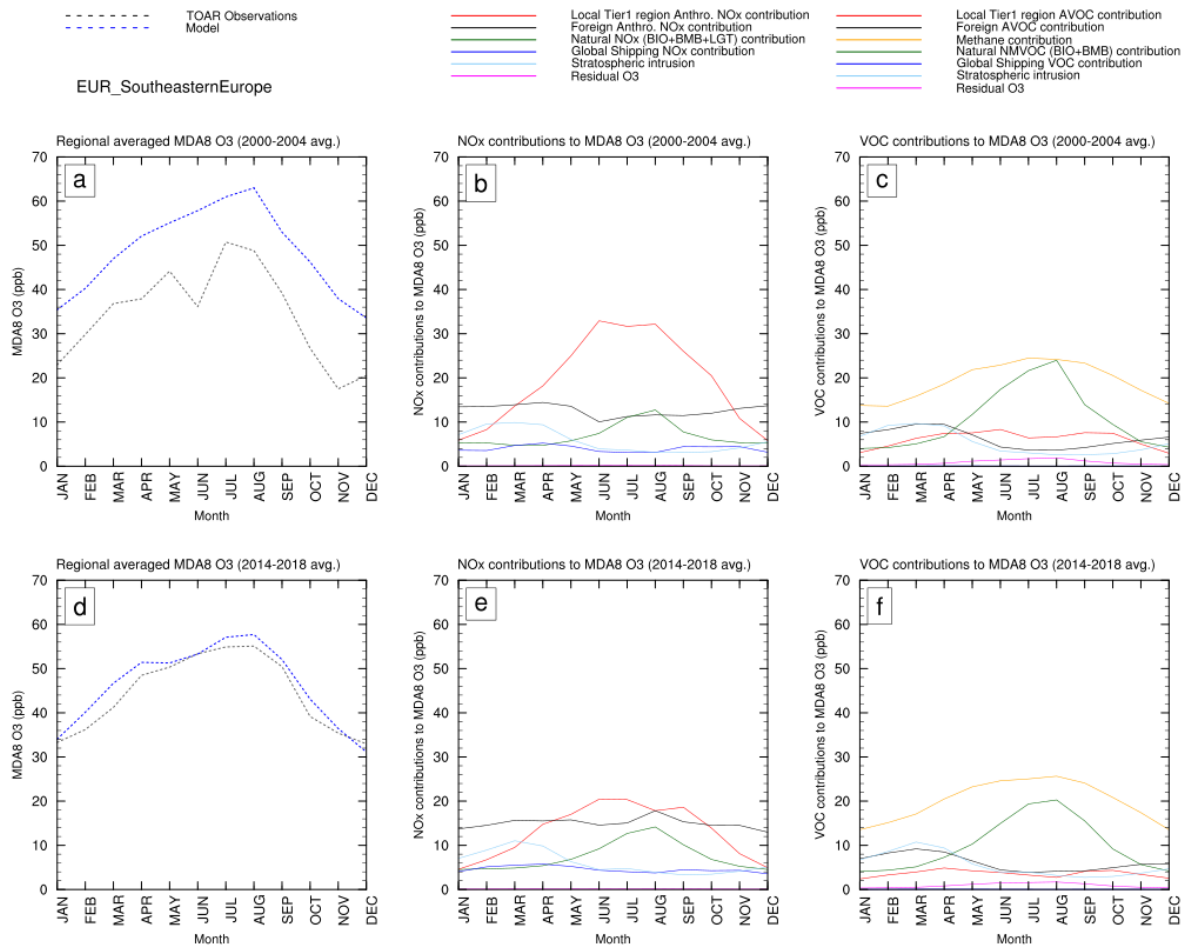

45 **Figure S7: 5-year average MDA8 O<sub>3</sub> seasonal cycles for Southeastern Europe for 2000-2004 (a) and 2014-2018 (b) along with their NO<sub>x</sub> (b,e) and VOC contributions (c,f).**



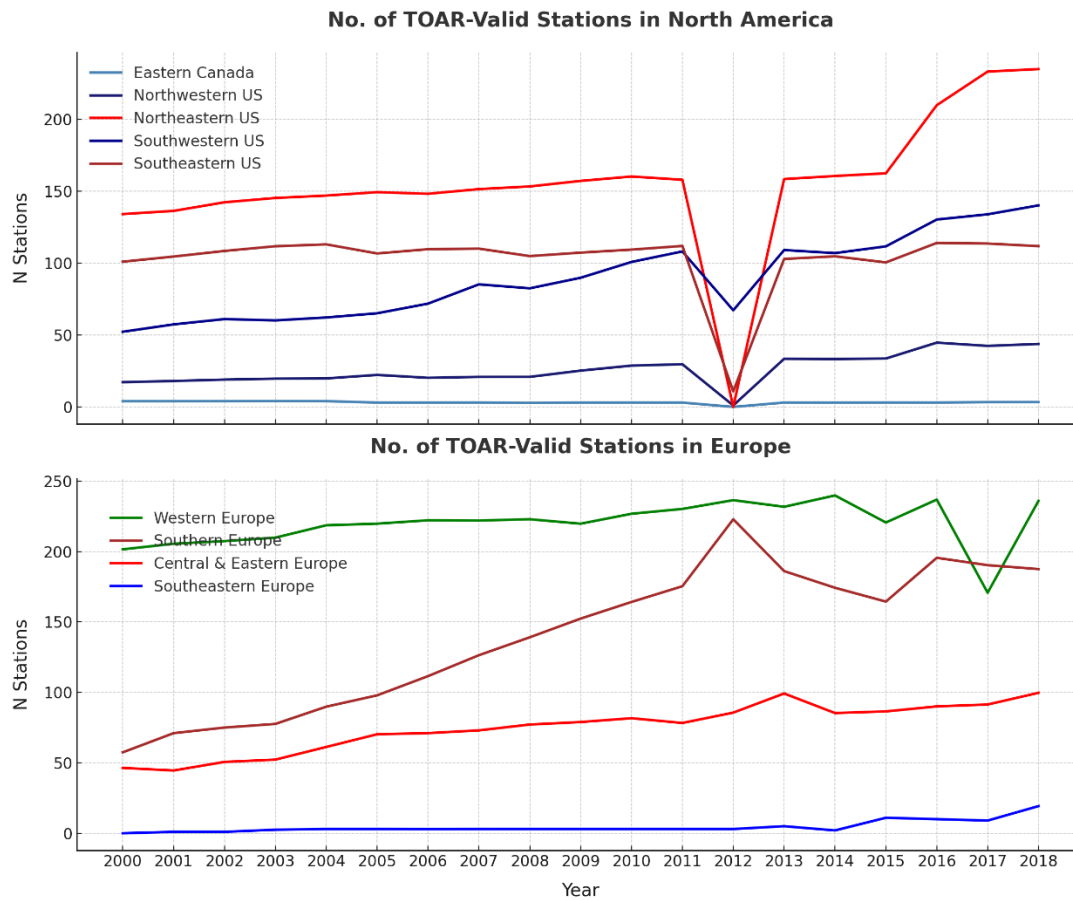

55

**Figure S8: Average number of TOAR rural stations available per year within each receptor region for North America (top) and Europe (bottom) for the 2000-2018 period.**

60

65

70 **Table S1: Thiel-Sen trends in ppb/yr and their significance (shown in brackets) for Peak Season Ozone and its tagged source contributions for various receptor regions.**

| <b>Region</b>                       | <b>TOAR</b>     | <b>Model</b>    | <b>Local Ant. NOx</b> | <b>Foreign Ant. NOx</b> | <b>Natural NOx</b> | <b>Ship NOx</b> | <b>Local AVO C</b> | <b>Foreign AVO C</b> | <b>Methane</b> | <b>natural VOC</b> | <b>Ship AVO C</b> | <b>Strat.</b>  |
|-------------------------------------|-----------------|-----------------|-----------------------|-------------------------|--------------------|-----------------|--------------------|----------------------|----------------|--------------------|-------------------|----------------|
| <b>Eastern Canada</b>               | -0.24<br>(1)    | -0.35<br>(0.99) | -0.75<br>(1)          | 0.2 (1)                 | 0.06<br>(0.97)     | 0.08<br>(1)     | -0.32<br>(1)       | 0.09<br>(0.99)       | 0.02<br>(0.47) | -0.17<br>(0.89)    | 0<br>(0.33)       | 0.12<br>(0.99) |
| <b>Northwestern US</b>              | -0.11<br>(0.82) | -0.11<br>(0.97) | -0.38<br>(1)          | 0.12<br>(1)             | 0.07<br>(0.95)     | 0.04<br>(1)     | -0.15<br>(1)       | 0.02<br>(0.91)       | 0.03<br>(0.97) | -0.03<br>(0.97)    | 0 (1)             | 0.02<br>(0.38) |
| <b>Southwestern US</b>              | -0.34<br>(1)    | -0.25<br>(1)    | -0.71<br>(1)          | 0.2 (1)                 | 0.05<br>(0.91)     | 0.05<br>(1)     | -0.25<br>(1)       | 0.11<br>(1)          | -0.09<br>(1)   | -0.12<br>(0.79)    | 0 (1)             | 0.13<br>(0.99) |
| <b>Northeastern US</b>              | -0.43<br>(1)    | -0.52<br>(1)    | -0.94<br>(1)          | 0.17<br>(1)             | 0.13<br>(1)        | 0.06<br>(1)     | -0.37<br>(1)       | 0.08<br>(0.99)       | -0.11<br>(1)   | -0.25<br>(0.97)    | -0<br>(0.92)      | 0.12<br>(0.99) |
| <b>Southeastern US</b>              | -0.47<br>(1)    | -0.6<br>(1)     | -1.07<br>(1)          | 0.17<br>(1)             | 0.11<br>(1)        | 0.08<br>(1)     | -0.33<br>(1)       | 0.09<br>(1)          | -0.16<br>(1)   | -0.33<br>(0.99)    | 0<br>(0.94)       | 0.14<br>(1)    |
| <b>Western Europe</b>               | -0.13<br>(0.96) | -0.01<br>(0.22) | -0.26<br>(1)          | 0.06<br>(0.99)          | 0.06<br>(1)        | 0.12<br>(1)     | -0.16<br>(1)       | -0<br>(0.47)         | 0.08<br>(1)    | 0.07<br>(0.97)     | 0<br>(0.56)       | 0.04<br>(0.82) |
| <b>Southern Europe</b>              | -0.04<br>(0.52) | -0.17<br>(0.98) | -0.51<br>(1)          | 0.07<br>(0.98)          | 0.06<br>(0.94)     | 0.16<br>(1)     | -0.22<br>(1)       | -0.02<br>(0.77)      | 0.01<br>(0.11) | 0.01<br>(0.11)     | 0<br>(0.88)       | 0.04<br>(0.67) |
| <b>Central &amp; Eastern Europe</b> | -0.43<br>(1)    | -0.04<br>(0.47) | -0.27<br>(1)          | 0.1<br>(0.99)           | 0.07<br>(1)        | 0.07<br>(1)     | -0.18<br>(1)       | -0.02<br>(0.94)      | 0.1 (1)        | 0.09<br>(0.92)     | 0<br>(0.78)       | 0.01<br>(0.17) |
| <b>Southeastern Europe</b>          | 0.98<br>(0.99)  | 0.01<br>(0)     | -0.57<br>(1)          | 0.29<br>(1)             | 0.22<br>(1)        | 0.05<br>(0.99)  | -0.24<br>(1)       | -0.02<br>(0.67)      | 0.23<br>(0.97) | 0.01<br>(0)        | 0<br>(0.86)       | 0.06<br>(0.47) |
